# Supplementary material for: Reconstructing atomic Fe coordination in the PMS activation process to realize efficient BPA degradation at low temperature
Source: Royal Society of Chemistry journal article supplement (doi:10.1039/d2en01156e), 2023-01-01
Supplement: d2en01156e1.pdf [file d2en01156e1.pdf]

**Supporting Information (SI)**

**Reconstructing Atomic Fe Coordination in PMS Activation Process to Realize  
Efficient BPA Degradation at Low Temperature**

Yuxuan Lin,<sup>#a</sup> Weihua Qin,<sup>#a</sup> Yuwei Lu<sup>a</sup>, Mingye Ren<sup>a</sup>, Pan Gao<sup>b</sup>, Feng Xiao<sup>a</sup> and

Shaoxia Yang<sup>\*a</sup>

<sup>a</sup> School of Water Resources and Hydropower Engineering, North China Electric Power University, Beijing, 102206, PR China

<sup>b</sup> School of Renewable Energy, North China Electric Power University, Beijing, 102206, PR China

<sup>#</sup> Author Contributions: Yuxuan Lin and Weihua Qin contributed equally.

<sup>\*</sup> Corresponding author: Shaoxia Yang (yangshaoxia2012@126.com)

Tel.: +86-10-61772456; Fax: +86-10-61772230.

**The supplementary materials include 32 Pages, 2 Texts, 5 Tables, 17 Figures.**

## Contents

- Text S1.** Materials synthesis.
- Text S2.** Contributions of diverse ROS to BPA oxidation in Fe–N/P<sub>n</sub>–C/PMS systems.
- Table S1.** High performance liquid chromatography (HPLC) operating conditions for organic analysis.
- Table S2.** Summary of Fe loading in the Fe–N–C SACs for activating PMS systems.
- Table S3.** Comparison of the BPA degradation over different SACs in the Fenton-like reaction for activating PMS near neutral pH.
- Table S4.** Comparison on the BPA degradation over different Fe-based nanocatalysts in the Fenton-like reaction.
- Table S5.** Parameters of the obtained water samples.
- Fig. S1.** SEM images of (a) Fe–N–C and (b) Fe–N/P<sub>1.6</sub>–C SACs.
- Fig. S2.** XPS survey spectrum for the Fe–N/P<sub>1.6</sub>–C SAC.
- Fig. S3.** Fe–N contents of N 1s and Fe 2p XPS spectra for the Fe–N/P<sub>n</sub>–C SACs.
- Fig. S4.** XPS spectra of (a) Fe 2p and (b) P 2p for the Fe–N/P<sub>n</sub>–C SACs.
- Fig. S5.** The ratio of (Fe–N)/(Fe–P) for the Fe–N/P<sub>n</sub>–C SACs.
- Fig. S6.** Adsorption of BPA on the Fe SACs in the heterogeneous Fenton-like reaction ([BPA]<sub>0</sub> = 20 mg/L, [Catalyst]<sub>0</sub> = 0.1 g/L, pH<sub>0</sub> = 6.8, T = 4°C).
- Fig. S7.** Relationship between different P/N ratios of the Fe–N/P<sub>n</sub>–C SACs and the initial reaction rate for the BPA degradation ([BPA]<sub>0</sub> = 20 mg/L, PMS

= 0.2 g/L, [Catalyst]<sub>0</sub> = 0.1 g/L, pH<sub>0</sub> = 6.8).

**Fig. S8.** TOC removal during BPA degradation in the Fe SACs/PMS systems ([BPA]<sub>0</sub> = 20 mg/L, PMS = 0.2 g/L, [Catalyst]<sub>0</sub> = 0.1 g/L, pH<sub>0</sub> = 6.8, T = 4°C).

**Fig. S9.** Comparison of the TOF over the reported nanocatalysts for the BPA degradation.

**Fig. S10.** The BPA removal in the presence of inorganic anions in the Fenton-like reaction over the Fe–N/P<sub>1.6</sub>–C SAC ([BPA]<sub>0</sub> = 20 mg/L, PMS = 0.2 g/L, [Catalyst]<sub>0</sub> = 0.1 g/L, pH<sub>0</sub> = 6.8, T = 4°C).

**Fig. S11.** The relationship between the initial reaction rates removing different pollutants over the Fe–N/P<sub>1.6</sub>–C SAC and their IP values ([BPA]<sub>0</sub> = 20 mg/L, PMS = 0.2 g/L, [Catalyst]<sub>0</sub> = 0.1 g/L, pH<sub>0</sub> = 6.8, T = 4°C).

**Fig. S12.** Stability of the Fe–N/P<sub>1.6</sub>–C SAC in the Fenton-like reaction for the BPA degradation ([BPA]<sub>0</sub> = 20 mg/L, PMS = 0.2 g/L, [Catalyst]<sub>0</sub> = 0.1 g/L, pH<sub>0</sub> = 6.8, T = 4°C).

**Fig. S13.** BPA removal over Fe-based catalysts alone with the addition of different (a) N or (b) P sources ([BPA]<sub>0</sub> = 20 mg/L, PMS = 0.2 g/L, [Catalyst]<sub>0</sub> = 0.1 g/L, pH<sub>0</sub> = 6.8, T = 4°C).

**Fig. S14.** EIS curves of the Fe–N/P<sub>n</sub>–C SACs.

**Fig. S15.** Effect of SCN<sup>−</sup> on BPA degradation in the Fe SACs/PMS system ([BPA]<sub>0</sub> = 20 mg/L, PMS = 0.2 g/L, [Catalyst]<sub>0</sub> = 0.1 g/L, [SCN<sup>−</sup>]<sub>0</sub> = 4.38 mM, pH<sub>0</sub> = 6.8, T = 4°C).

**Fig. S16.** The simplified models of (a) Fe–N–C and (b) Fe–N/P<sub>1.6</sub>–C SACs.

**Fig. S17.** PDOS of Fe–N–C and Fe–N/P<sub>1.6</sub>–C SACs.

**Text S1. Materials synthesis.**

**Synthesis of N/P–C catalyst.** Similar to the synthesis of Fe–N/P<sub>1.6</sub>–C SAC, 400  $\mu$ L (6 mmol) of pyrrole monomer and 737  $\mu$ L (0.8 mmol) of phytic acid were mixed with 2 mL of ethanol/water (v/v = 1:1). 684 mg (3 mmol) of ammonium persulfate was dissolved into another 6 mL of ethanol/water (v/v = 1:1). The subsequent steps were identical to those for Fe–N/P<sub>1.6</sub>–C SAC to prepare N, P co-doped porous carbon materials, and the resulting samples were named as N/P–C catalyst.

**Synthesis of N–C catalyst.** Except for the addition of phytic acid, nitrogen-doped porous carbon (NC) was prepared by the same procedure as for N/P–C catalyst. The resulting sample was named as N–C catalyst.

**Synthesis of Fe–N–C SAC.** For the synthesis of Fe–N–C SAC, 10 mg of FeCl<sub>3</sub>·6H<sub>2</sub>O and 30 mg of 1,10-phenanthroline were added to 2 mL of ethanol, mixed well and added dropwise into 100 mg of N–C. The solution was stirred continuously at room temperature until it evaporated. Then, the powder was dried at 80 °C. After drying, the powder was calcinated at 700 °C for 2 h under an N<sub>2</sub> atmosphere at a heating rate of 5 °C/min. The final product was etched with 1 M H<sub>2</sub>SO<sub>4</sub> at 80 °C for 2 h to produce Fe–N–C SAC.

**Synthesis of Fe–P–C catalyst.** Instead of standing overnight, the samples were aged at 70 °C for 2 h under stirring, and then dried at 80 °C overnight, except for the addition of pyrrole monomer. Then, only P-doped porous carbon materials were prepared by the same procedure as Fe–N/P<sub>1.6</sub>–C SAC. The obtained sample was named as Fe–P–C catalyst.

**Synthesis of Fe–N/P<sub>n</sub>–C SACs.** Consistent with the preparation of Fe–N/P<sub>1.6</sub>–C SAC, the only difference was that phytic acids (0.2, 0.5, 1, and 1.5 mmol) were added to obtain catalysts with different N/P ratios (0.4, 1, 2, and 3).

**Text S2.** Contributions of diverse ROS to BPA oxidation in Fe–N/P<sub>n</sub>–C/PMS systems.

On the basis of the BPA degradation in the presence of radical scavengers, the contributions of diverse ROS to BPA removal in Fe–N/P<sub>n</sub>–C/PMS systems were determined as follows<sup>1</sup>:

$$\lambda(\bullet\text{OH}\&\text{SO}_4^{\bullet-}) = [(1 - C/C_0)_{\text{Control}} - (1 - C/C_0)_{\text{TBA}} - (1 - C/C_0)_{\text{methanol}}] \times 100\% \quad (\text{S1})$$

$$\lambda(\text{HO}_2^{\bullet}/\text{O}_2^{\bullet-}) = [(1 - C/C_0)_{\text{Control}} - (1 - C/C_0)_{\text{p-BQ}}] \times 100\% \quad (\text{S2})$$

$$\lambda(^1\text{O}_2) = 1 - \lambda(\bullet\text{OH}) - \lambda(\text{HO}_2^{\bullet}/\text{O}_2^{\bullet-}) \quad (\text{S3})$$

Where  $[1-(C/C_0)_{\text{Control}}]$  stands for the degradation efficiency of BPA in the absence of quenching agent, and  $[1-(C/C_0)_{\text{TBA}}]$ ,  $[1-(C/C_0)_{\text{methanol}}]$  and  $[1-(C/C_0)_{\text{p-BQ}}]$  are the degradation efficiency of BPA after adding TBA, methanol, and p-BQ, respectively.

**Table S1.** High performance liquid chromatography (HPLC) operating conditions for organic analysis.

| Compounds | Wavelength<br>(nm) | Flow rate<br>(mL/min) | Ultrapure<br>water<br>(%) | 0.2% Acetic<br>acid<br>(%) | Acetonitrile<br>(%) | Methanol<br>(%) | Structural formula                                                                    |
|-----------|--------------------|-----------------------|---------------------------|----------------------------|---------------------|-----------------|---------------------------------------------------------------------------------------|
| BPA       | 276                | 1.0                   | 30                        | -                          | -                   | 70              | 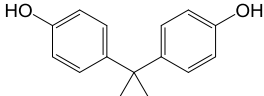   |
| Phenol    | 254                |                       | -                         | 40                         | -                   | 60              | 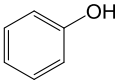   |
| IBP       | 222                |                       | 25                        | -                          | 75                  | -               | 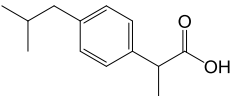   |
| PHT       | 225                |                       | 40                        | -                          | 60                  | -               | 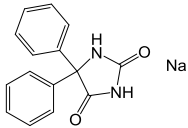   |
| 4-CP      | 280                |                       | 40                        |                            |                     | 60              | 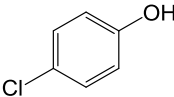   |
| 2,4-D     | 284                |                       |                           | 75                         |                     | 26              | 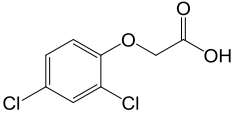 |

**Table S2.** Summary of Fe loading in the Fe–N–C SACs for activating PMS systems.

| Catalyst                 | Loading (wt.%) | Reference        |
|--------------------------|----------------|------------------|
| Fe–N/P <sub>1.6</sub> –C | 2.32           | <b>This work</b> |
| Fe–N/C                   | 0.88           | 2                |
| SA–Fe/CN                 | 0.62           | 3                |
| SAFe–OCN                 | 0.84           | 4                |
| Fe–N–C                   | 0.82           | 5                |
| Fe–SAC                   | 0.71           | 6                |
| SA–Fe–NC                 | 1.12           | 7                |
| Fe–SAC                   | 2.60           | 8                |

**Table S3.** Comparison of the BPA degradation over different SACs in the Fenton-like reaction for activating PMS near neutral pH.

| Catalyst                 | BPA<br>(mg/L) | Catalyst<br>dosage<br>(g/L) | PMS<br>concentration<br>(g/L) | T<br>(°C) | Removal<br>efficiency | TOF<br>(L/(min·g)) | $E_a$<br>(kJ/mol) | Reference        |
|--------------------------|---------------|-----------------------------|-------------------------------|-----------|-----------------------|--------------------|-------------------|------------------|
| Fe-N/P <sub>1.6</sub> -C | 20            | 0.2                         | 0.2                           | 25        | 98.3% (5 min)         | 24.49              | 3.7               | <b>This work</b> |
| Co-N <sub>2</sub>        | 20            | 0.2                         | 0.2                           | 30        | 100% (5 min)          | 3.47               | -                 | 1                |
| Co-N <sub>4</sub> -C     | 20            | 0.1                         | 0.2                           | 25        | 100% (60 min)         | 4.52               | -                 | 9                |
| 3SACu@NBC                | 20            | 0.1                         | 0.4                           | 25        | 100% (30 min)         | 1.57               | -                 | 10               |
| Fe <sub>SA</sub> -N-C-20 | 20            | 0.15                        | 0.4                           | -         | 100% (20 min)         | 1.6                | -                 | 2                |
| Mn-ISA@CN                | 20            | 0.2                         | 0.2                           | 25        | 100% (6 min)          | 5.69               | -                 | 11               |
| NiZn@N-G-900             | 20            | 0.2                         | 0.2                           | 30        | 100% (80 min)         | 2.67               | 15.75             | 12               |
| Cu-N <sub>4</sub> /C-B   | 20            | 0.1                         | 0.2                           | 25        | 98% (5 min)           | 5.6                | -                 |                  |
| Cu-N <sub>4</sub> /C-P   | 20            | 0.1                         | 0.2                           | 25        | 11% (5 min)           | 0.08               | -                 | 13               |
| Cu-N <sub>4</sub> /C     | 20            | 0.1                         | 0.2                           | 25        | 57% (5 min)           | 1.02               | -                 |                  |

**Table S4.** Comparison on the BPA degradation over different Fe-based nanocatalysts in the Fenton-like reaction.

| Catalyst                                           | BPA<br>(mg/L) | Catalyst<br>dosage<br>(g/L) | Oxidant                       | Oxidant<br>concentration<br>(mM) | pH  | T<br>(°C) | Removal<br>efficiency | TOF<br>(L/(min·g)) | $E_a$<br>(kJ/mol) | Reference        |
|----------------------------------------------------|---------------|-----------------------------|-------------------------------|----------------------------------|-----|-----------|-----------------------|--------------------|-------------------|------------------|
| Fe-N/P <sub>1.6</sub> -C                           | 20            | 0.1                         | PMS                           | 0.65                             | 6.8 | 4         | 98.3% (5 min)         | 24.5               | 3.7               | <b>This work</b> |
| GS-Fe-NPs                                          | 25            | 0.3                         | H <sub>2</sub> O <sub>2</sub> | 1000                             | 6.9 | 30        | 95% (140 min)         | 0.1067             | 128.8             | 14               |
| MIL-101(Fe)                                        | 50            | 0.2                         | H <sub>2</sub> O <sub>2</sub> | 10                               | 6.0 | 30        | 100% (30 min)         | 1.75               | 46                | 15               |
| Fe <sub>0.8</sub> Co <sub>2.2</sub> O <sub>4</sub> | 20            | 0.1                         | PMS                           | 0.65                             | 3.0 | 30        | 95% (60 min)          | 0.49               | 19.45             | 16               |
| FeCA-g-C <sub>3</sub> N <sub>4</sub>               | 20            | 0.5                         | H <sub>2</sub> O <sub>2</sub> | 10                               | 4.0 | -         | 92.5% (30 min)        | 0.17               | -                 | 17               |
| Fe <sup>3+</sup> @g-C <sub>3</sub> N <sub>4</sub>  | 20            | 0.2                         | PMS                           | 0.65                             | 3.0 | -         | 100% (15 min)         | 3.02               | -                 | 18               |
| Ag/AgCl/Fh                                         | 30            | 1                           | H <sub>2</sub> O <sub>2</sub> | 5                                | 3.0 | -         | 100% (60 min)         | 0.05               | -                 | 19               |
| CN-Cu(II)-CuAlO <sub>2</sub>                       | 25            | 1                           | H <sub>2</sub> O <sub>2</sub> | 5                                | 6-7 | 35        | 98% (120 min)         | 0.03               | -                 | 20               |
| Fe-Co-85                                           | 20            | 0.2                         | H <sub>2</sub> O <sub>2</sub> | 80                               | 6.0 | 25        | 85% (6 min)           | 0.38               | -                 | 21               |

**Table S5.** Parameters of the obtained water samples.

|                                      | Secondary<br>effluent | South-to-North<br>Water Diversion |
|--------------------------------------|-----------------------|-----------------------------------|
| pH                                   | 6.56                  | 8.36                              |
| TOC (mg/L)                           | 5.22                  | 3.07                              |
| Cl <sup>-</sup> (mg/L)               | 6.05                  | 0.23                              |
| HCO <sub>3</sub> <sup>-</sup> (mg/L) | 21.36                 | -                                 |
| SO <sub>4</sub> <sup>2-</sup> (mg/L) | 47.62                 | 23.49                             |

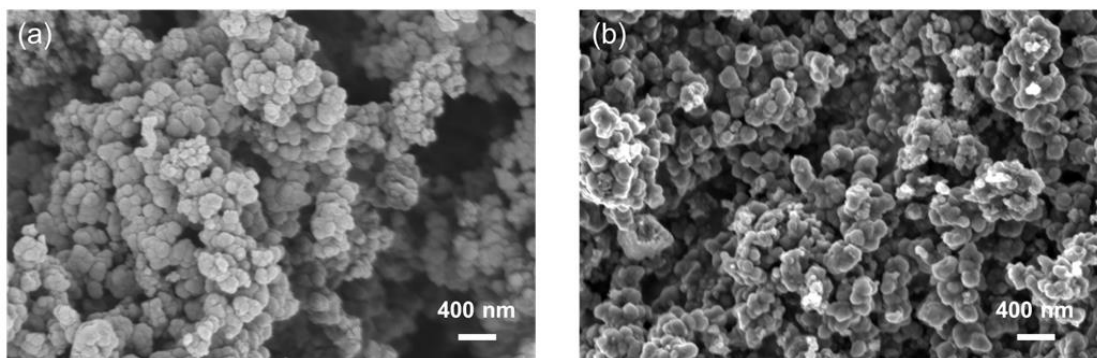

**Fig. S1.** SEM images of (a) Fe-N-C and (b) Fe-N/P<sub>1.6</sub>-C SACs.

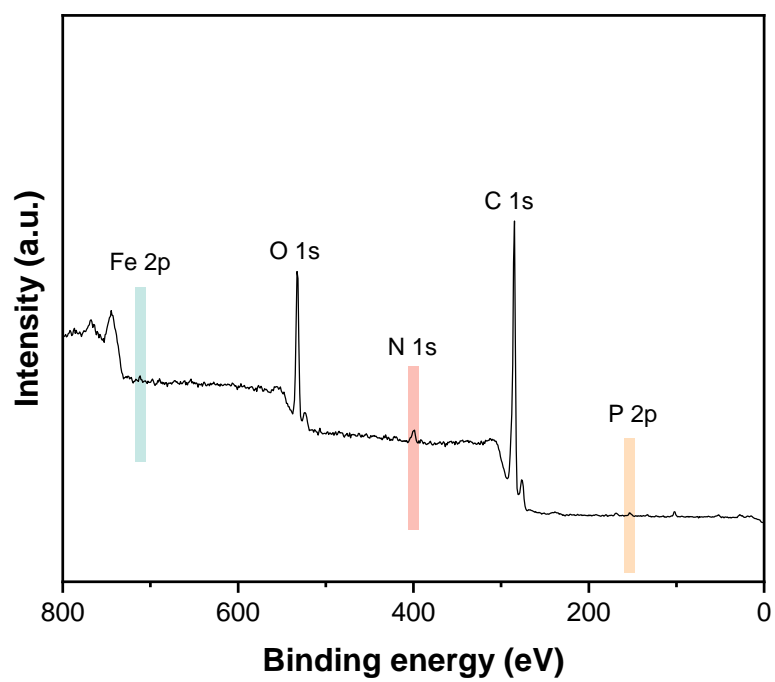

**Fig. S2.** XPS survey spectrum for the Fe-N/P<sub>1.6</sub>-C SAC.

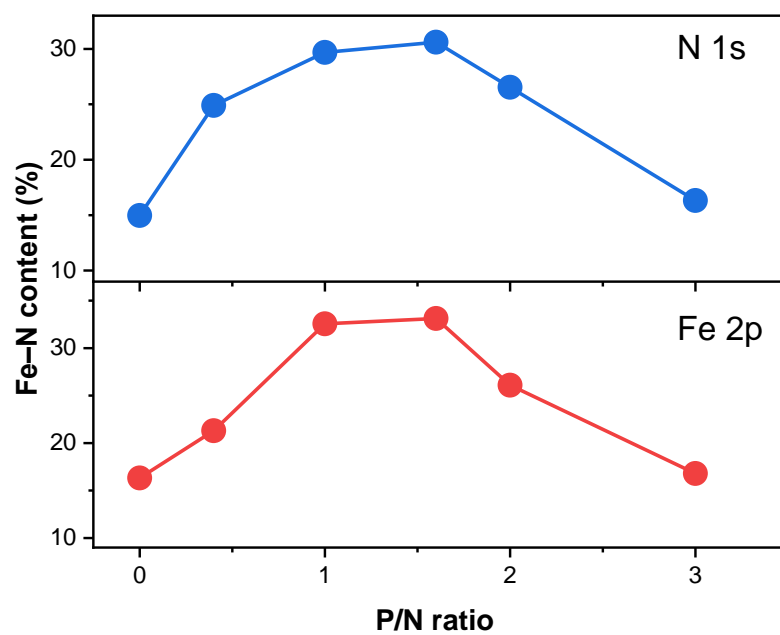

**Fig. S3.** Fe-N contents of N 1s and Fe 2p XPS spectra for the Fe-N/P<sub>n</sub>-C SACs.

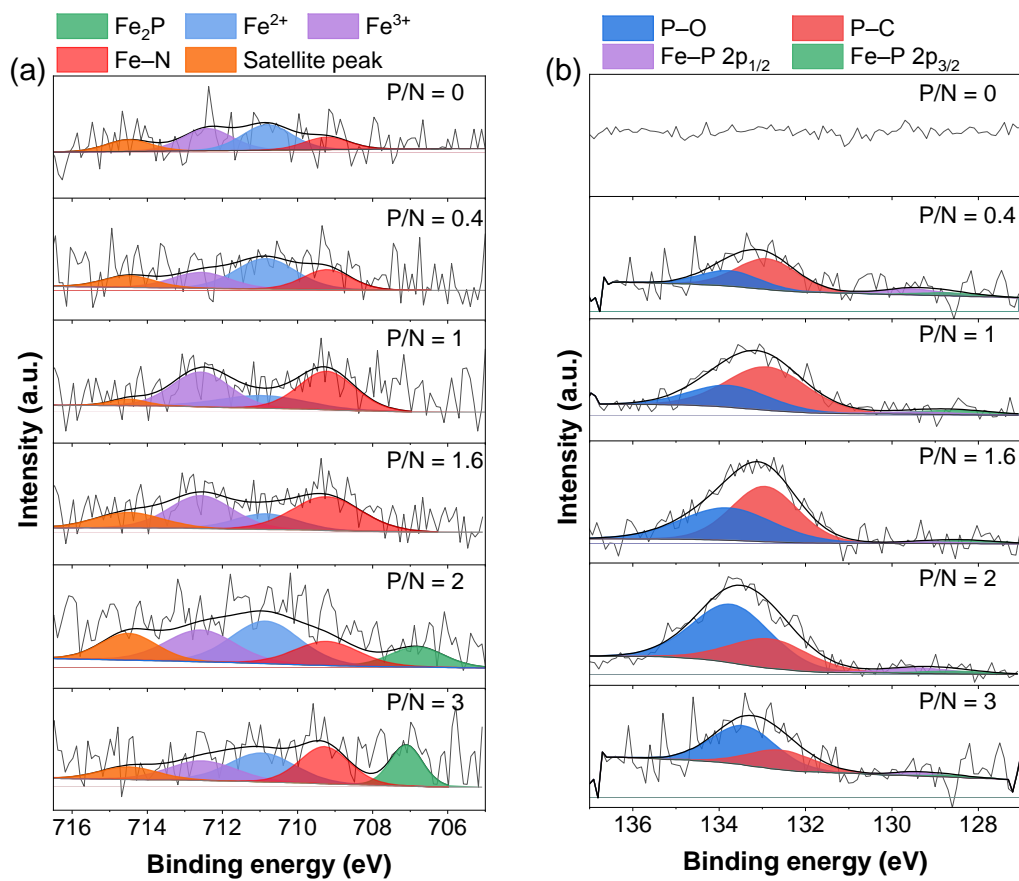

**Fig. S4.** XPS spectra of (a) Fe 2p and (b) P 2p for the Fe-N/P<sub>n</sub>-C SACs.

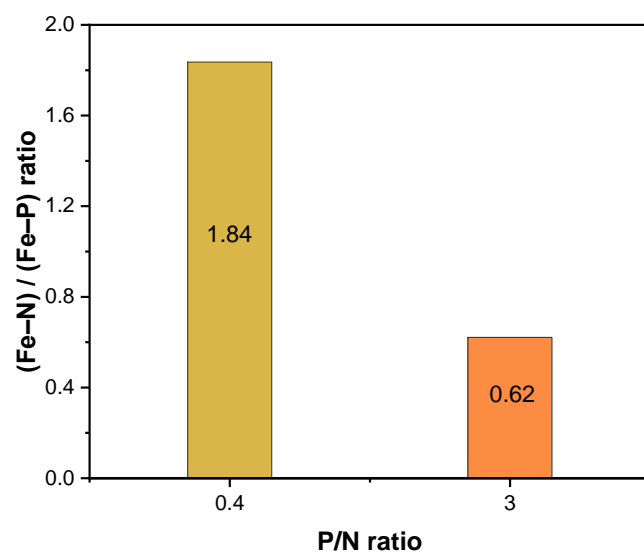

**Fig. S5.** The ratio of (Fe-N)/(Fe-P) for the Fe-N/P<sub>n</sub>-C SACs.

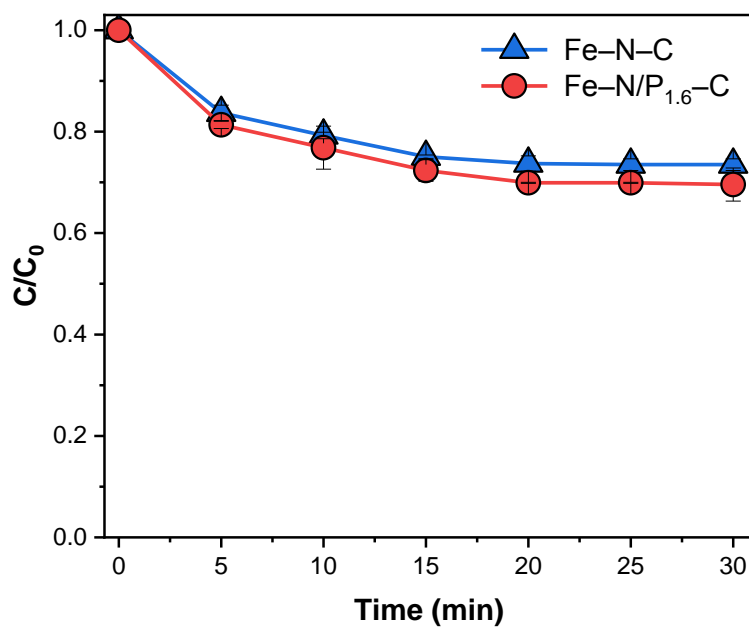

**Fig. S6.** Adsorption of BPA on the Fe SACs in the heterogeneous Fenton-like reaction

( $[\text{BPA}]_0 = 20 \text{ mg/L}$ ,  $[\text{Catalyst}]_0 = 0.1 \text{ g/L}$ ,  $\text{pH}_0 = 6.8$ ,  $T = 4^\circ\text{C}$ ).

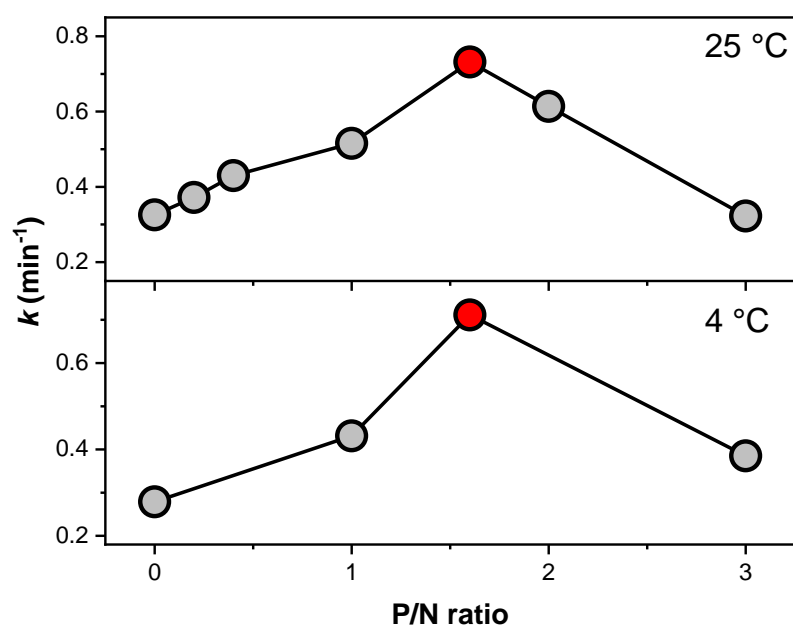

**Fig. S7.** Relationship between different P/N ratios of the Fe–N/P<sub>n</sub>–C SACs and the initial reaction rate for the BPA degradation ([BPA]<sub>0</sub> = 20 mg/L, PMS = 0.2 g/L, [Catalyst]<sub>0</sub> = 0.1 g/L, pH<sub>0</sub> = 6.8).

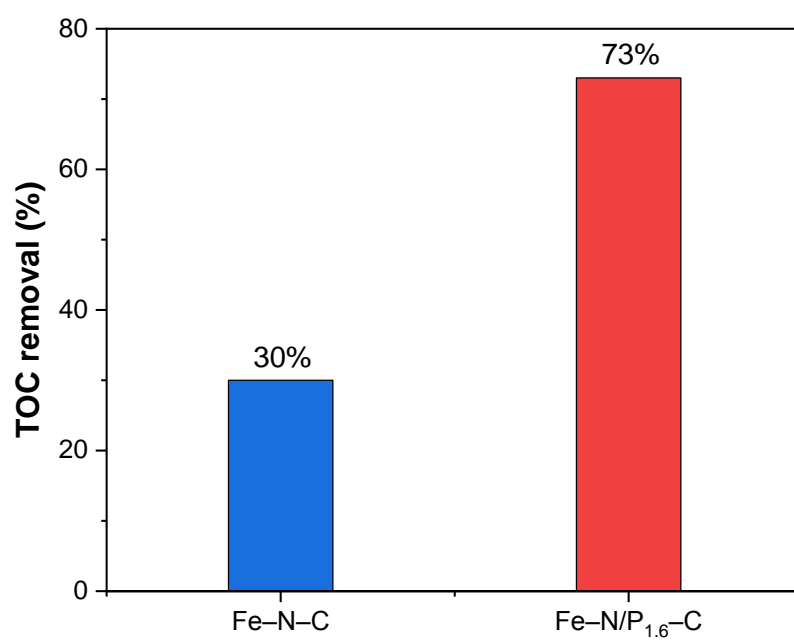

**Fig. S8.** TOC removal during BPA degradation in the Fe SACs/PMS systems ( $[\text{BPA}]_0 = 20 \text{ mg/L}$ ,  $\text{PMS} = 0.2 \text{ g/L}$ ,  $[\text{Catalyst}]_0 = 0.1 \text{ g/L}$ ,  $\text{pH}_0 = 6.8$ ,  $T = 4^\circ\text{C}$ ).

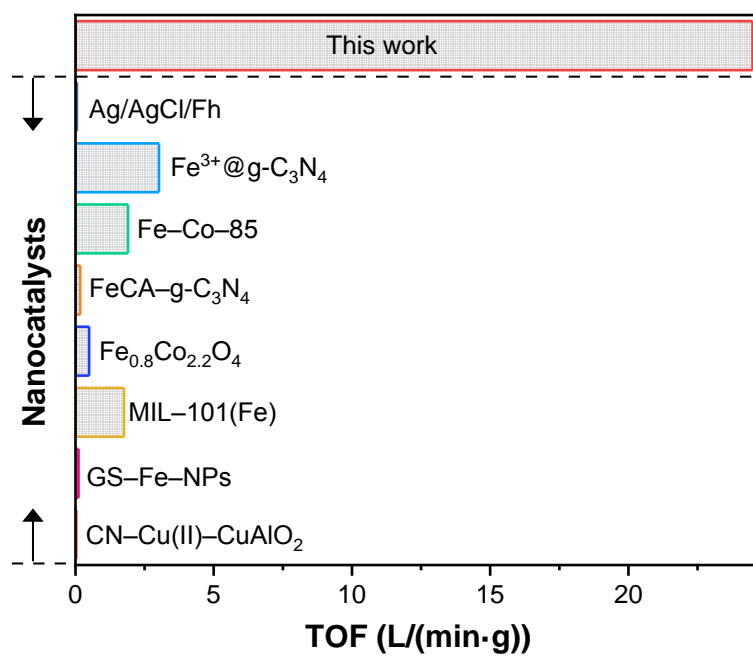

**Fig. S9.** Comparison of the TOF over the reported nanocatalysts for the BPA degradation.

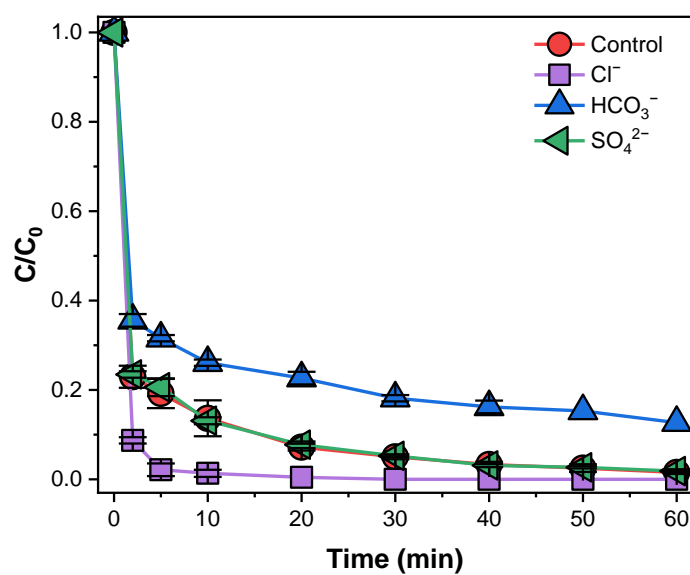

**Fig. S10.** The BPA removal in the presence of inorganic anions ( $\text{Cl}^-$ ,  $\text{HCO}_3^-$ ,  $\text{SO}_4^{2-}$ ) in the Fenton-like reaction over the Fe-N/P<sub>1.6</sub>-C SAC ( $[\text{BPA}]_0 = 20 \text{ mg/L}$ ,  $\text{PMS} = 0.2 \text{ g/L}$ ,  $[\text{Catalyst}]_0 = 0.1 \text{ g/L}$ ,  $\text{pH}_0 = 6.8$ ,  $T = 4^\circ\text{C}$ ).

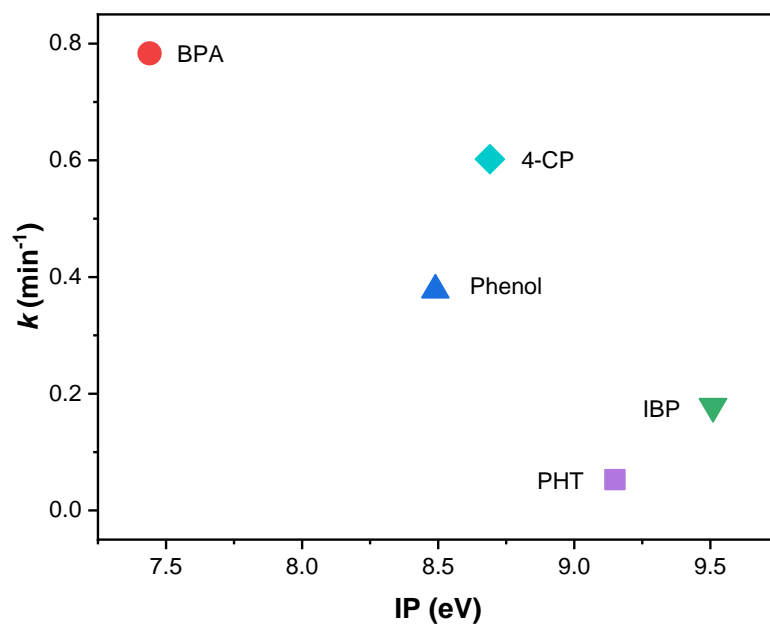

**Fig. S11.** The relationship between the initial reaction rates removing different pollutants over the Fe–N/P<sub>1.6</sub>–C SAC and their IP values ([BPA]<sub>0</sub> = 20 mg/L, PMS = 0.2 g/L, [Catalyst]<sub>0</sub> = 0.1 g/L, pH<sub>0</sub> = 6.8, T = 4°C).

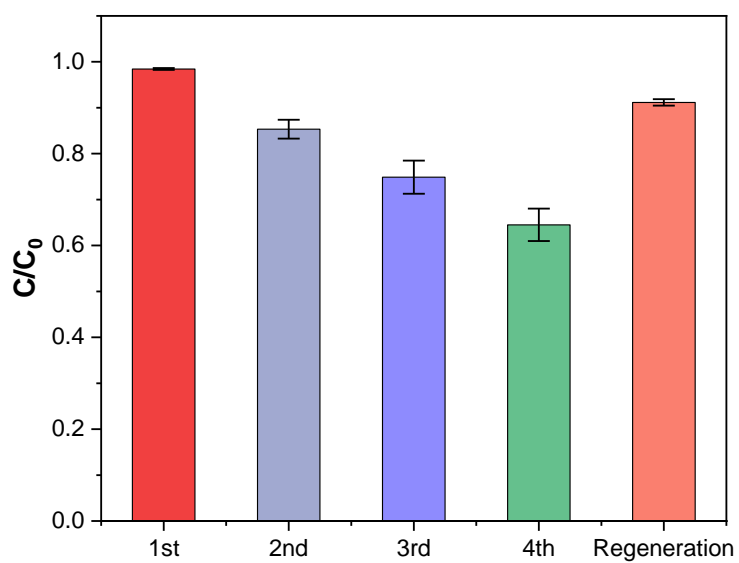

**Fig. S12.** Stability of the Fe-N/P<sub>1.6</sub>-C SAC in the Fenton-like reaction for the BPA degradation ( $[BPA]_0 = 20$  mg/L, PMS = 0.2 g/L,  $[Catalyst]_0 = 0.1$  g/L,  $pH_0 = 6.8$ ,  $T = 4^\circ\text{C}$ ).

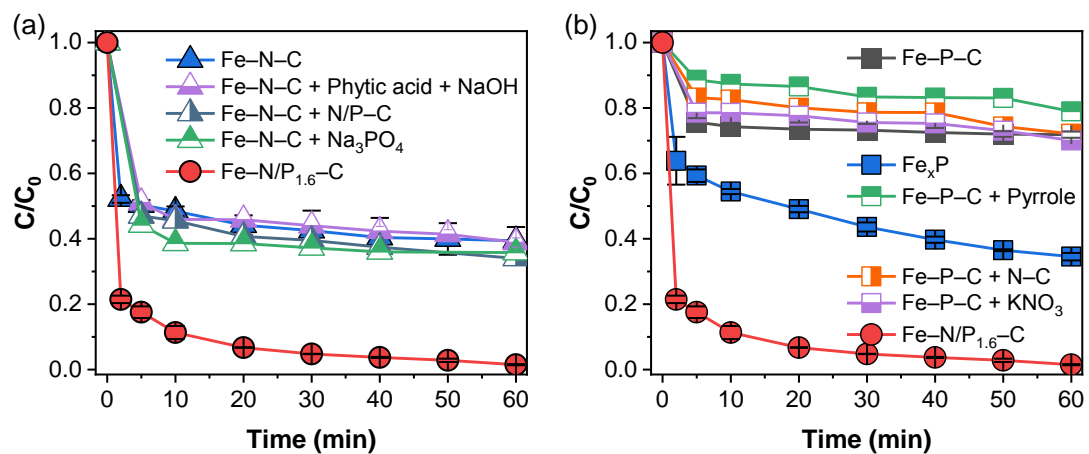

**Fig. S13.** BPA removal over Fe-based catalysts alone with the addition of different (a) N or (b) P sources ( $[\text{BPA}]_0 = 20 \text{ mg/L}$ ,  $\text{PMS} = 0.2 \text{ g/L}$ ,  $[\text{Catalyst}]_0 = 0.1 \text{ g/L}$ ,  $\text{pH}_0 = 6.8$ ,  $T = 4^\circ\text{C}$ ).

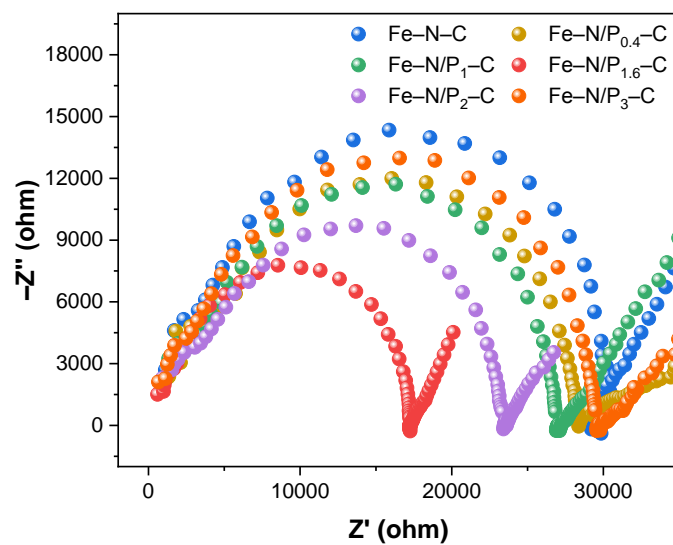

**Fig. S14.** EIS curves of the Fe-N/P<sub>n</sub>-C SACs.

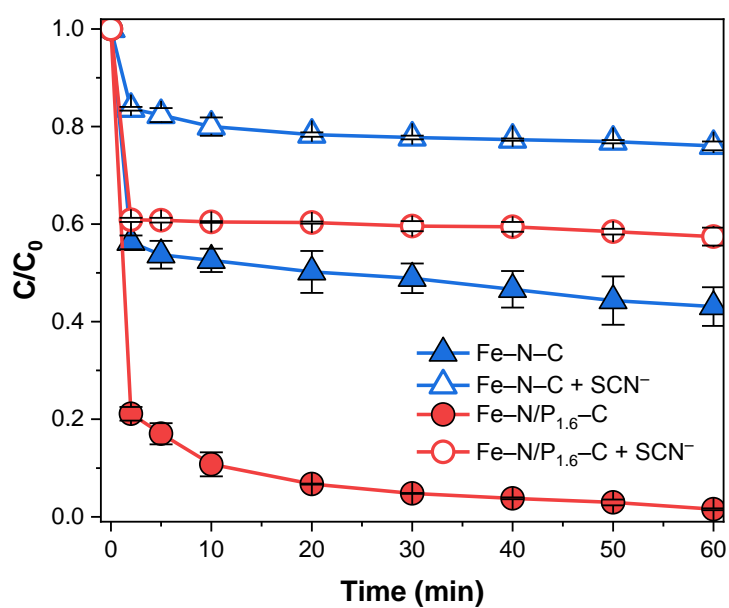

**Fig. S15.** Effect of  $SCN^-$  on BPA degradation in the Fe SACs/PMS system ( $[BPA]_0 = 20$  mg/L, PMS = 0.2 g/L,  $[Catalyst]_0 = 0.1$  g/L,  $[SCN^-]_0 = 4.38$  mM,  $pH_0 = 6.8$ ,  $T = 4^\circ C$ ).

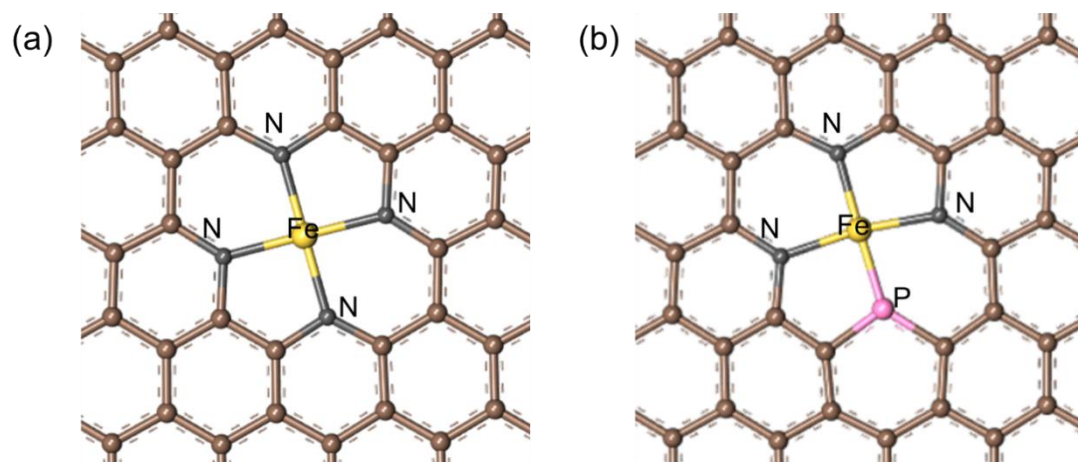

**Fig. S16.** The simplified models of (a) Fe–N–C and (b) Fe–N/P<sub>1.6</sub>–C SACs.

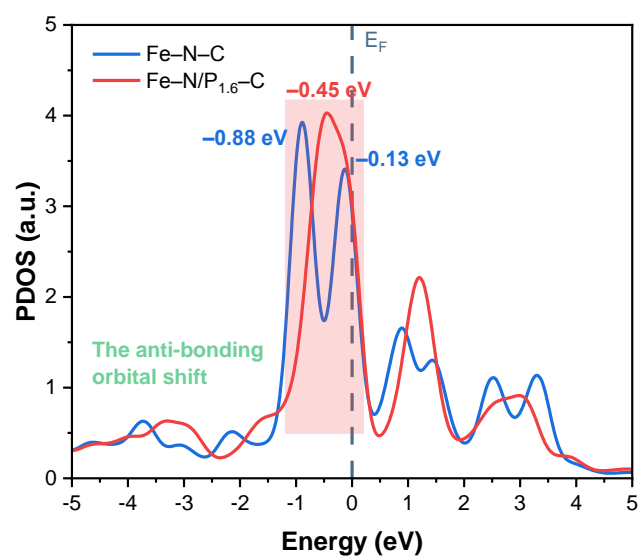

**Fig. S17.** PDOS of Fe-N-C and Fe-N/P<sub>1.6</sub>-C SACs.

## Reference

1. X. Liang, D. Wang, Z. Zhao, T. Li, Y. Gao and C. Hu, Coordination number dependent catalytic activity of single-atom cobalt catalysts for Fenton-like reaction, *Adv. Funct. Mater.*, 2022, **32**, 2203001.
2. T. Yang, S. Fan, Y. Li and Q. Zhou, Fe-N/C single-atom catalysts with high density of Fe-N<sub>x</sub> sites toward peroxymonosulfate activation for high-efficient oxidation of bisphenol A: Electron-transfer mechanism, *Chem. Eng. J.*, 2021, **419**, 129590.
3. Y. Xiong, H. C. Li, C. W. Liu, L. R. Zheng, C. Liu, J. O. Wang, S. J. Liu, Y. H. Han, L. Gu, J. S. Qian and D. S. Wang, Single-atom Fe catalysts for Fenton-like reactions: Roles of different N species, *Adv. Mater.*, 2022, **34**, 2110653.
4. Z. Zhou, M. Q. Li, C. G. Kuai, Y. X. Zhang, V. F. Smith, F. Lin, A. Aiello, D. P. Durkin, H. N. Chen and D. M. Shuai, Fe-based single-atom catalysis for oxidizing contaminants of emerging concern by activating peroxides, *J. Hazard. Mater.*, 2021, **418**, 126294.
5. L. Peng, X. G. Duan, Y. N. Shang, B. Y. Gao and X. Xu, Engineered carbon supported single iron atom sites and iron clusters from Fe-rich Enteromorpha for Fenton-like reactions via nonradical pathways, *Appl. Catal. B-Environ.*, 2021, **287**, 119963.
6. Y. Gao, T. W. Wu, C. D. Yang, C. Ma, Z. Y. Zhao, Z. H. Wu, S. J. Cao, W. Geng, Y. Wang, Y. Y. Yao, Y. N. Zhang and C. Cheng, Activity trends and mechanisms in peroxymonosulfate-assisted catalytic production of singlet oxygen over atomic

- metal-N-C catalysts, *Angew. Chem. Int. Edit.*, 2021, **60**, 22513-22521.
7. Y. W. Gao, Y. Zhu, T. Li, Z. H. Chen, Q. K. Jiang, Z. Y. Zhao, X. Y. Liang and C. Hu, Unraveling the high-activity origin of single-atom iron catalysts for organic pollutant oxidation via peroxymonosulfate activation, *Environ. Sci. Technol.*, 2021, **55**, 8318-8328.
  8. M. Yang, R. Wu, S. Cao, Y. Li, S. Huo, W. Wang, Z. Hu and X. Xu, Versatile pathways for oxidating organics via peroxymonosulfate activation by different single atom catalysts confining with Fe-N<sub>4</sub> or Cu-N<sub>4</sub> sites, *Chem. Eng. J.*, 2023, **451**, 138606.
  9. M. Yang, Z. Hou, X. Zhang, B. Gao, Y. Li, Y. Shang, Q. Yue, X. Duan and X. Xu, Unveiling the origins of selective oxidation in single-atom catalysis via Co-N<sub>4</sub>-C intensified radical and nonradical pathways, *Environ. Sci. Technol.*, 2022, **56**, 11635–11645.
  10. J. Pan, B. Gao, P. Duan, K. Guo, M. Akram, X. Xu, Q. Yue and Y. Gao, Improving peroxymonosulfate activation by copper ion-saturated adsorbent-based single atom catalysts for the degradation of organic contaminants: electron-transfer mechanism and the key role of Cu single atoms, *J. Mater. Chem. A*, 2021, **9**, 11604-11613.
  11. J. Yang, D. Zeng, Q. Zhang, R. Cui, M. Hassan, L. Dong, J. Li and Y. He, Single Mn atom anchored on N-doped porous carbon as highly efficient Fenton-like catalyst for the degradation of organic contaminants, *Appl. Catal. B-Environ.*, 2020, **279**, 119363.

12. J. J. You, C. Y. Zhang, Z. L. Wu, Z. M. Ao, W. Y. Sun, Z. K. Xiong, S. J. Su, G. Yao and B. Lai, N-doped graphite encapsulated metal nanoparticles catalyst for removal of Bisphenol A via activation of peroxymonosulfate: A singlet oxygen-dominated oxidation process, *Chem. Eng. J.*, 2021, **415**, 128890.
13. X. Zhou, M.-K. Ke, G.-X. Huang, C. Chen, W. Chen, K. Liang, Y. Qu, J. Yang, Y. Wang, F. Li, H.-Q. Yu and Y. Wu, Identification of Fenton-like active Cu sites by heteroatom modulation of electronic density, *Proc. Natl. Acad. Sci. U. S. A.*, 2022, **119**, e2119492119.
14. B. Guo, T. T. Xu, L. Zhang and S. Li, A heterogeneous Fenton-like system with green iron nanoparticles for the removal of bisphenol A: Performance, kinetics and transformation mechanism, *J. Environ. Manage.*, 2020, **272**, 111047.
15. P. P. Huang, L. L. Yao, Q. Chang, Y. H. Sha, G. D. Jiang, S. H. Zhang and Z. Li, Room-temperature preparation of highly efficient NH<sub>2</sub>-MIL-101(Fe) catalyst: The important role of -NH<sub>2</sub> in accelerating Fe(III)/Fe(II) cycling, *Chemosphere*, 2022, **291**, 133026.
16. X. Li, Z. H. Wang, B. Zhang, A. I. Rykov, M. A. Ahmed and J. H. Wang, Fe<sub>x</sub>Co<sub>3-x</sub>O<sub>4</sub> nanocages derived from nanoscale metal-organic frameworks for removal of bisphenol A by activation of peroxymonosulfate, *Appl. Catal. B-Environ.*, 2016, **181**, 788-799.
17. Y. Yin, R. X. Jia, W. M. Zhang, Y. Ren, X. Y. Li, M. Hua and L. Lv, Electron-rich oxygen enhanced Fe-doped g-C<sub>3</sub>N<sub>4</sub> mediated Fenton-like process: Accelerate Fe(III) reduction and strengthen catalyst stability, *J. Clean. Prod.*, 2021, **319**,

128680.

18. H. C. Li, C. Shan and B. C. Pan, Fe(III)-doped g-C<sub>3</sub>N<sub>4</sub> mediated peroxymonosulfate activation for selective degradation of phenolic compounds via high-valent iron-oxo species, *Environ. Sci. Technol.*, 2018, **52**, 2197-2205.
19. Y. P. Zhu, R. L. Zhu, Y. F. Xi, T. Y. Xu, L. X. Yan, J. X. Zhu, G. Q. Zhu and H. P. He, Heterogeneous photo-Fenton degradation of bisphenol A over Ag/AgCl/ferrihydrite catalysts under visible light, *Chem. Eng. J.*, 2018, **346**, 567-577.
20. L. Lyu, D. B. Yan, G. F. Yu, W. R. Cao and C. Hu, Efficient destruction of pollutants in water by a dual-reaction center Fenton-like process over carbon nitride compounds-complexed Cu(II)-CuAlO<sub>2</sub>, *Environ. Sci. Technol.*, 2018, **52**, 4294-4304.
21. J. Y. Liu, X. N. Li, B. Liu, C. X. Zhao, Z. C. Kuang, R. S. Hu, B. Liu, Z. M. Ao and J. H. Wang, Shape-controlled synthesis of metal-organic frameworks with adjustable Fenton-like catalytic activity, *ACS Appl. Mater. Interfaces.*, 2018, **10**, 38051-38056.
